# Supplementary material
Source: PubMed Central journal article supplement (PMC1301591)
Supplement: nar_33_21_6769__1.pdf [file nar_33_21_6769__1.pdf]

**Supplementary Data Fig. 1. WRN- interaction with FEN-1 lysine variants.** Purified recombinant FEN-1 mutant proteins in which either one or several lysines were replaced by alanines (M1, M2, M3 and M4 were mutated at the Lys 380, 377, 375 and 354, respectively, while M5 was mutated at Lys 380, 377 and 375 residues) were coated on to ELISA plates. Following blocking with 3% BSA, the wells were incubated with increasing concentrations of purified recombinant WRN (0-50 nM) for 1 hr at 30°C, and bound WRN was detected by ELISA using a rabbit polyclonal antibody against WRN followed by incubation with secondary horseradish peroxidase (HRP)-labeled antibodies and OPD substrate. Data points are the mean of three independent experiments performed in duplicate with standard deviations (SD) indicated by error bars.

**Supplementary Data Fig. 2. Association of WRN and FEN-1 in the chromatin fraction is increased upon MMC treatment.** Soluble and chromatin fractions prepared from HeLa cells that had been untreated or treated with 0.5 µg/ml MMC for 16 h were subjected to immunoprecipitation (IP) with anti-FEN-1 antibody. **Normal rabbit IgG was used for control immunoprecipitation from the soluble extract (last lane).**
