# Supplementary material
Source: PubMed Central journal article supplement (PMC1301591)

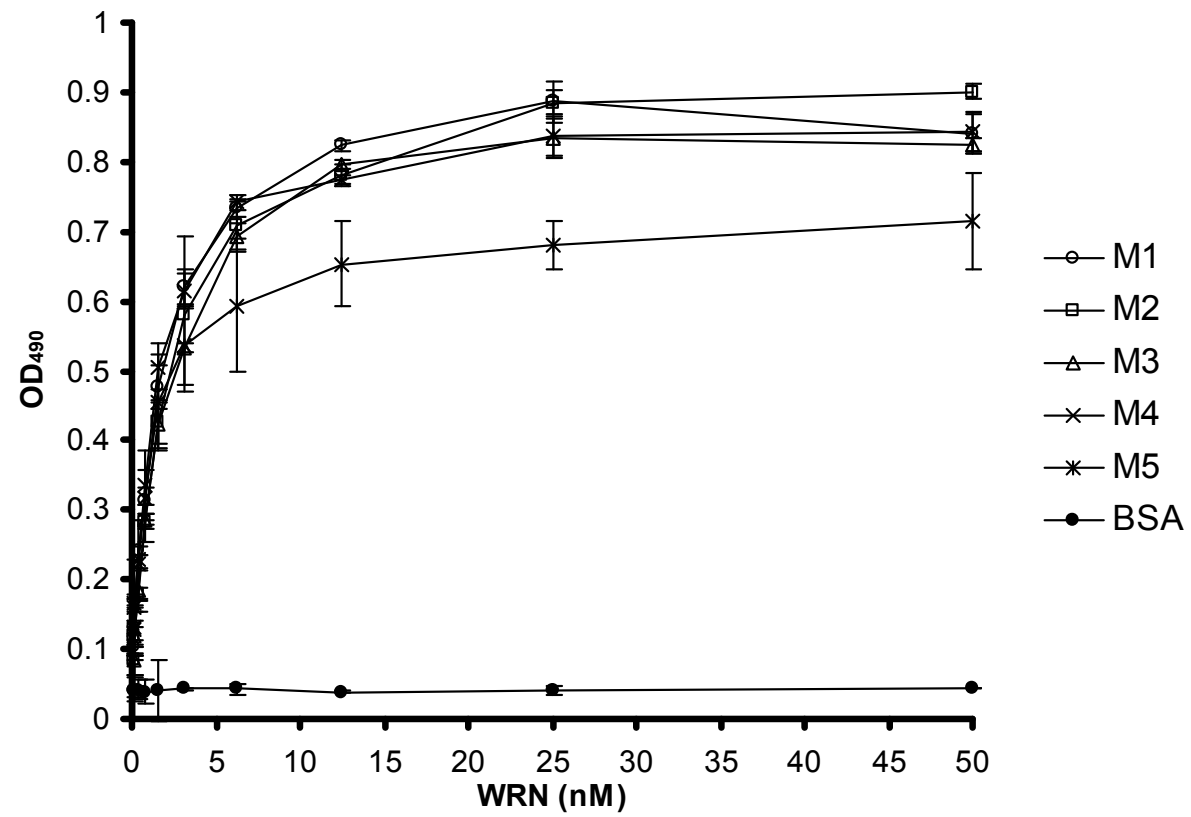

Supp. Data Fig. 1

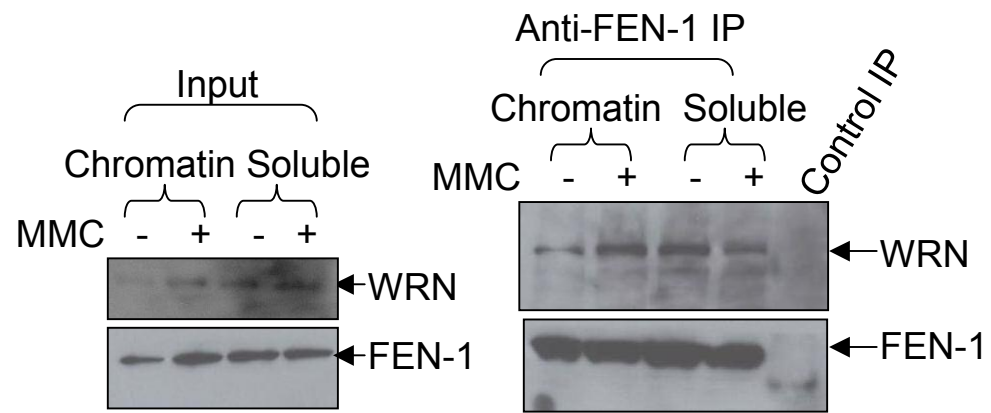

Supp. Data Fig. 2

Supplement: nar_33_21_6769__2.pdf [file nar_33_21_6769__2.pdf]
